# Supplementary material
Source: Springer Nature journal article supplement (https://www.springermedizin.de/resource/supplementary/12936_2010_1676_MOESM1_ESM.pdf/9542318)

### *msp1* - Burkina Faso

Genotypes

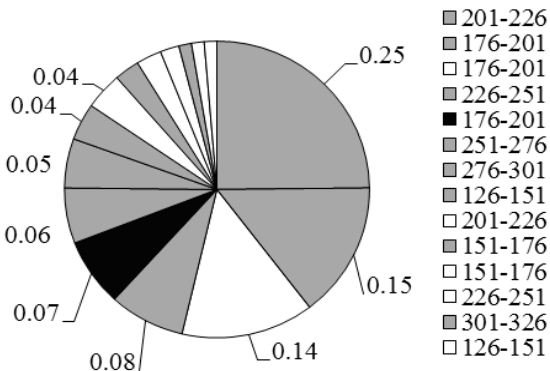

### *msp1* - São Tomé

Genotypes

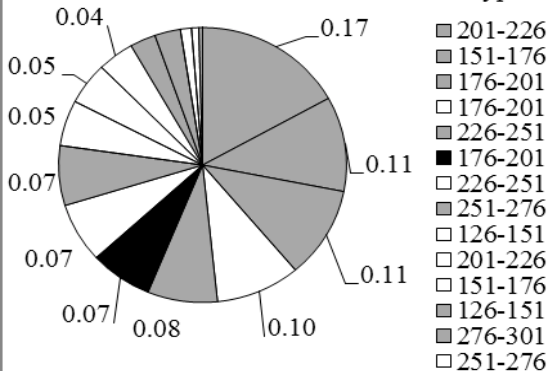

### *msp1* - Malawi

Genotypes

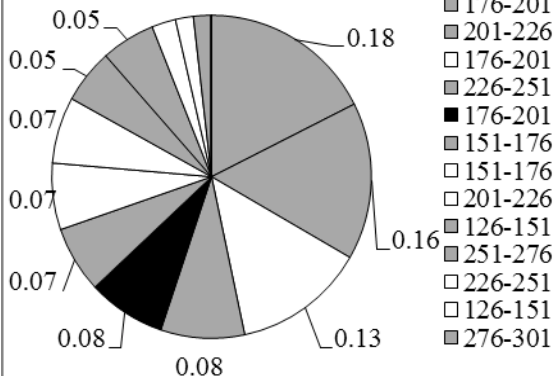

### *msp1* - Tanzania

Genotypes

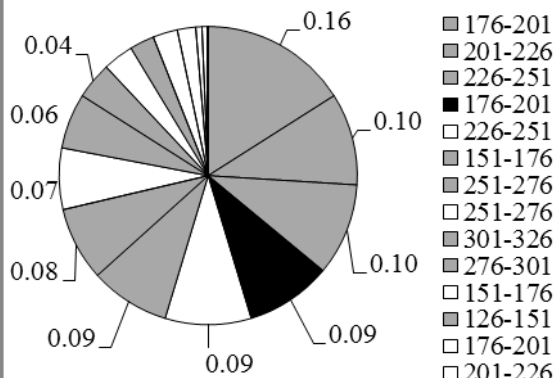

### *msp1* - Uganda

Genotypes

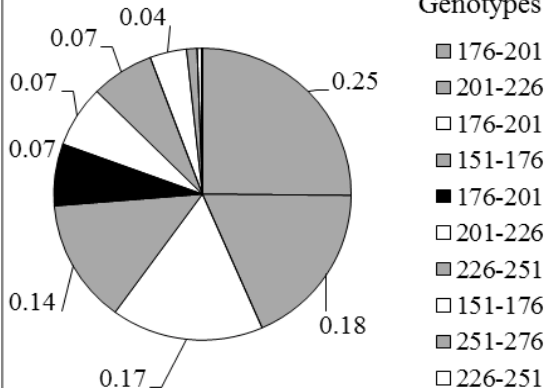

Supplement: MOESM1 [file 9542318]
